# Supplementary material
Source: Research Square preprint supplement (doi:10.21203/rs.3.rs-8715071/v1)
Supplement: Supplementary file 1 [file d266ef2bf471bf2a1cee88f7.docx]

**Supplementary Material**

**Enhanced sorption of triclosan from aqueous solution to *Rhizopus oryzae* biomass biofunctionalized with lipids.**

**Water, Air & Soil Pollution**

1Juan José Benítez-Cortez, 2Araceli Tomasini, 2Wylma Dolores Pérez-Pérez, 3Julio César García-Martínez, 4Deyanira Angeles-Beltrán, 1Héctor Hugo León-Santiestebán*

*Corresponding author:

1*Héctor Hugo León Santiestebán, Universidad Autónoma Metropolitana Azcapotzalco, Departamento de Energía, Ciudad de México, México.

E-mail: [hels@azc.uam.mx](mailto:hels@azc.uam.mx)

1José Benítez-Cortez, Universidad Autónoma Metropolitana-Azcapotzalco, Departamento de Energía, Ciudad de México, México.

2Araceli Tomasini, Universidad Autónoma Metropolitana-Iztapalapa, Departamento de Biotecnología, Ciudad de México, México.

2Wylma Dolores Pérez-Pérez, Iniversidad Autónoma Metropolitana-Iztapalapa, Departamento de Biotecnología, Ciudad de México, México.

3Julio César García-Martínez

Instituto Politécnico Nacional, Escuela Nacional de Ciencias Biológicas, Departamento de Biofísica, Ciudad de México, México.

4Deyanira Angeles-Beltrán

Universidad Autónoma Metropolitana-Azcapotzalco, Departamento de Ciencias Básicas, Ciudad de México, México.

**List of Figures**

**Fig. S1** The main effect plots for the sorption efficiency of TCS (%S).

**Fig. S2** The interaction plots for the sorption efficiency of TCS (%S).

**Fig. S3** Response surface plot that shows the effect of pH and biomass dose on the sorption efficiency of TCS at 115.9 rpm.

**Fig. S4** Response surface plot that shows the effect of biomass dose and agitation rate dose on the sorption efficiency of TCS at pH 5.68.

**Fig. S5** Effect of lipids on the sorption isotherms of TCS. Data were modeled with the Freundlich isotherm (―).


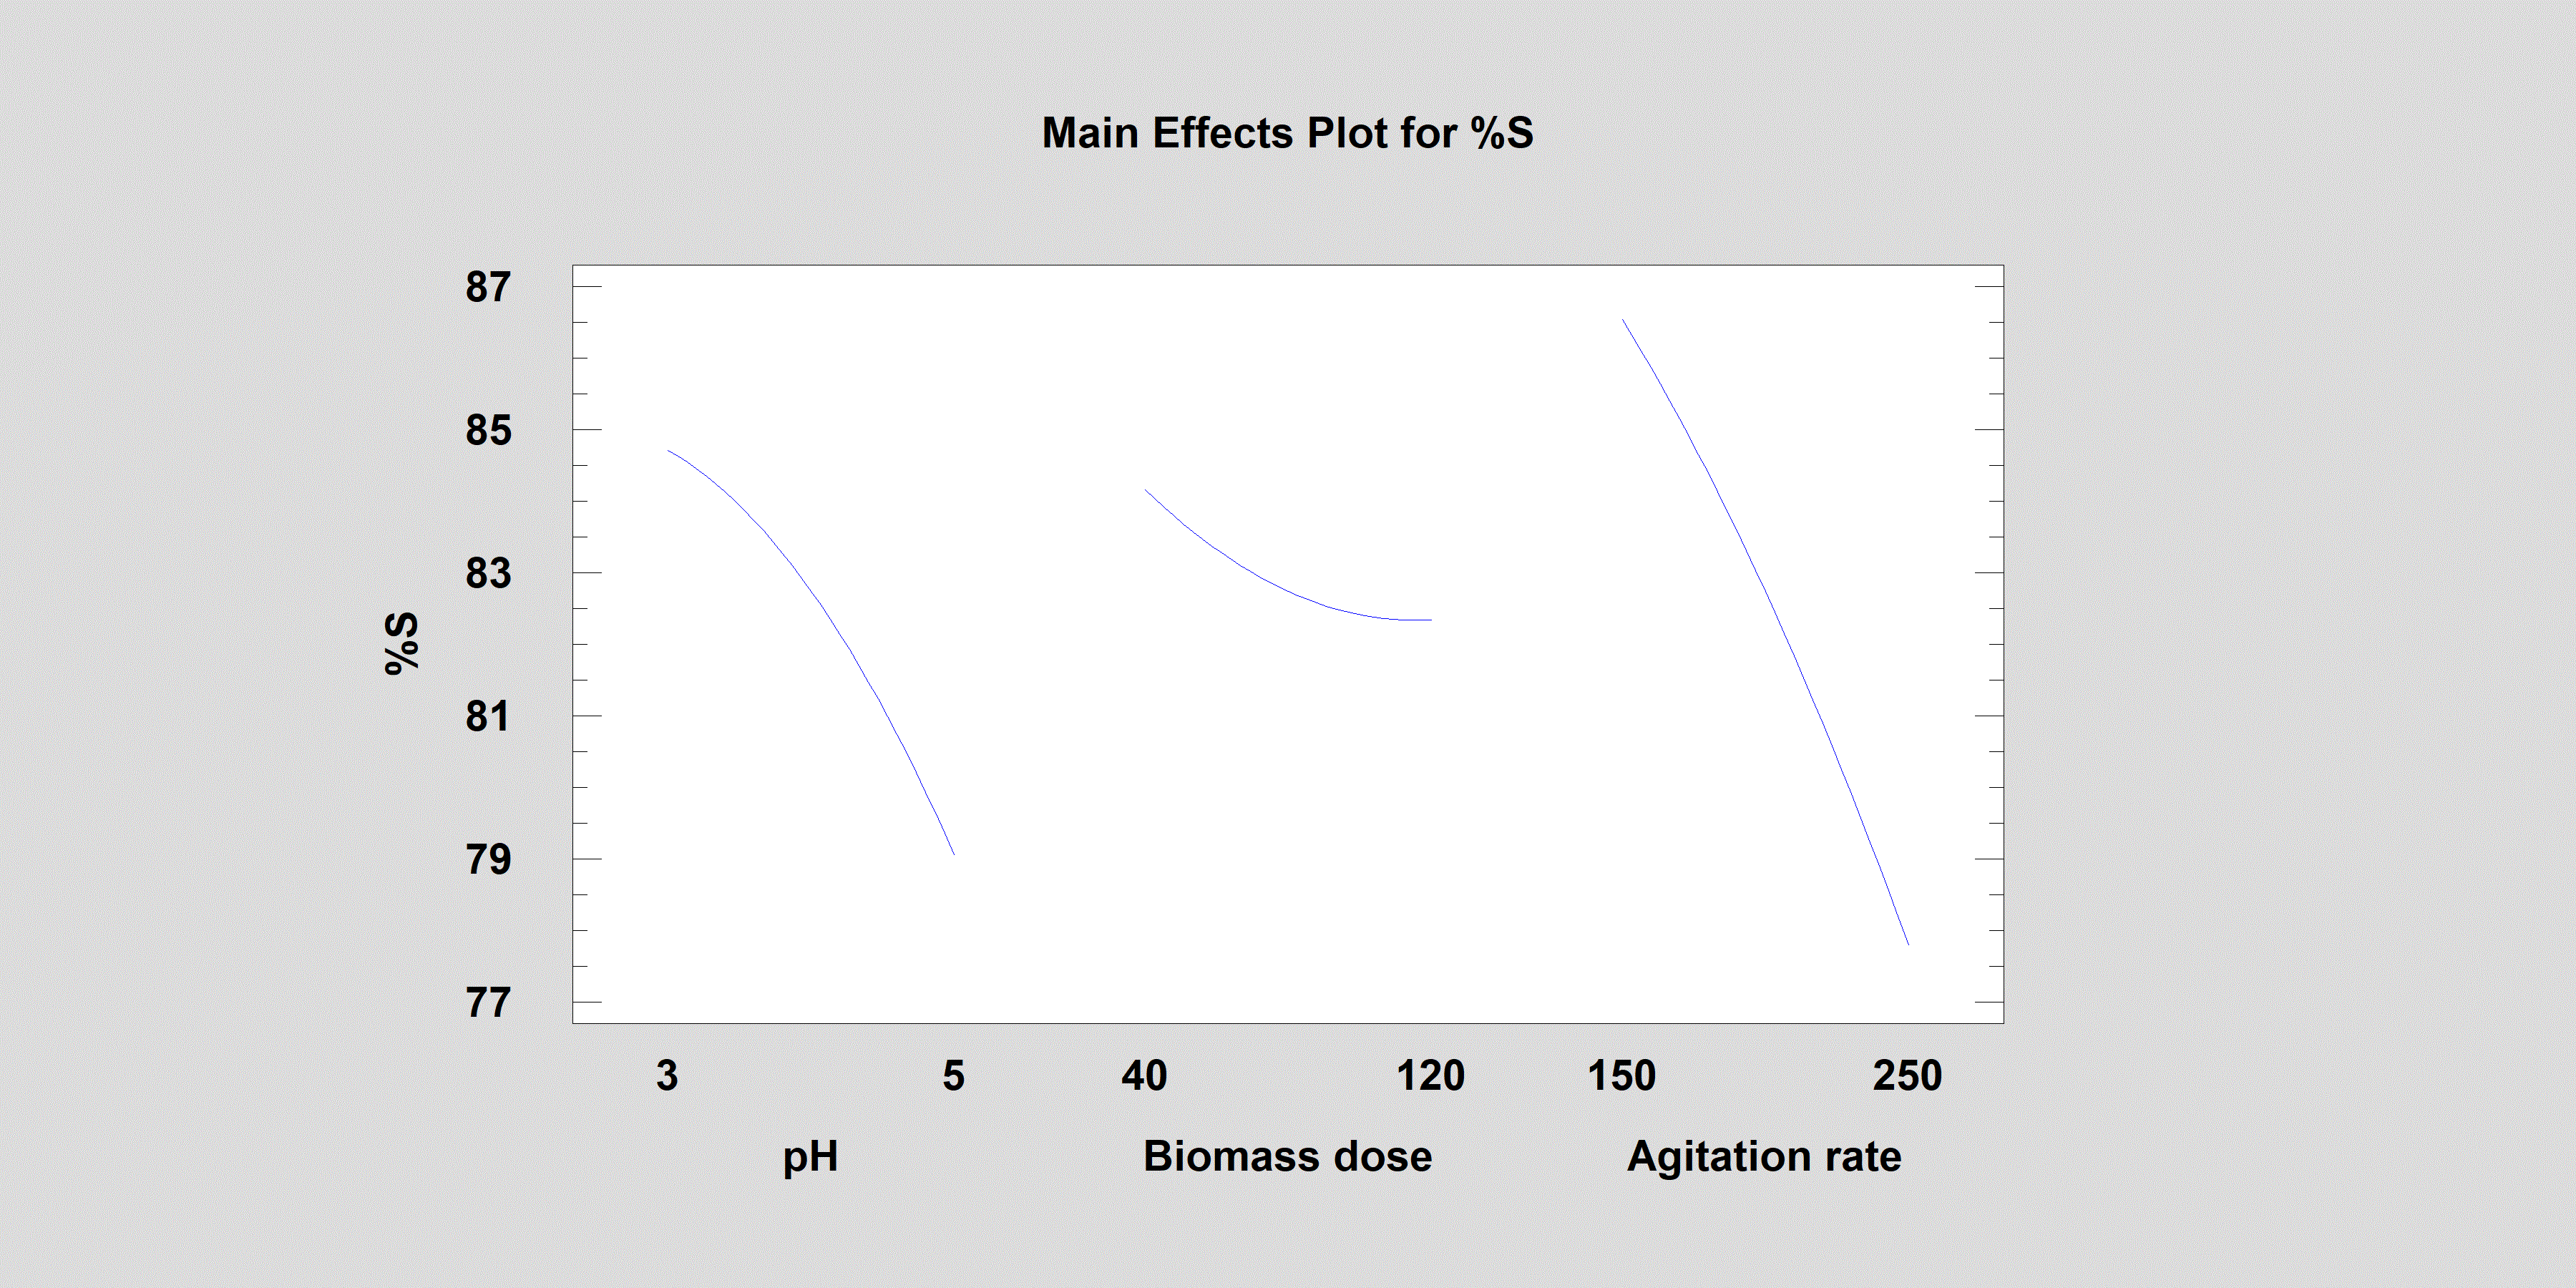


**Fig. S1** The main effect plots for the sorption efficiency of TCS (%S).


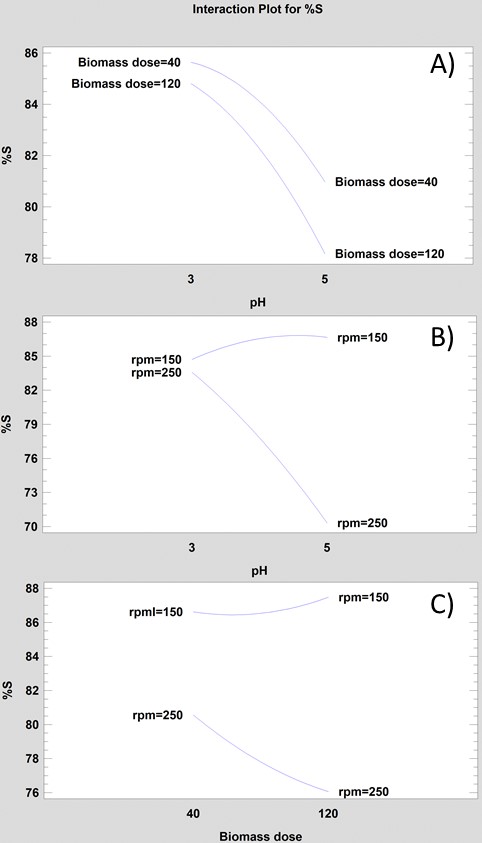


**Fig. S2** The interaction plots for the sorption efficiency of TCS (%S).


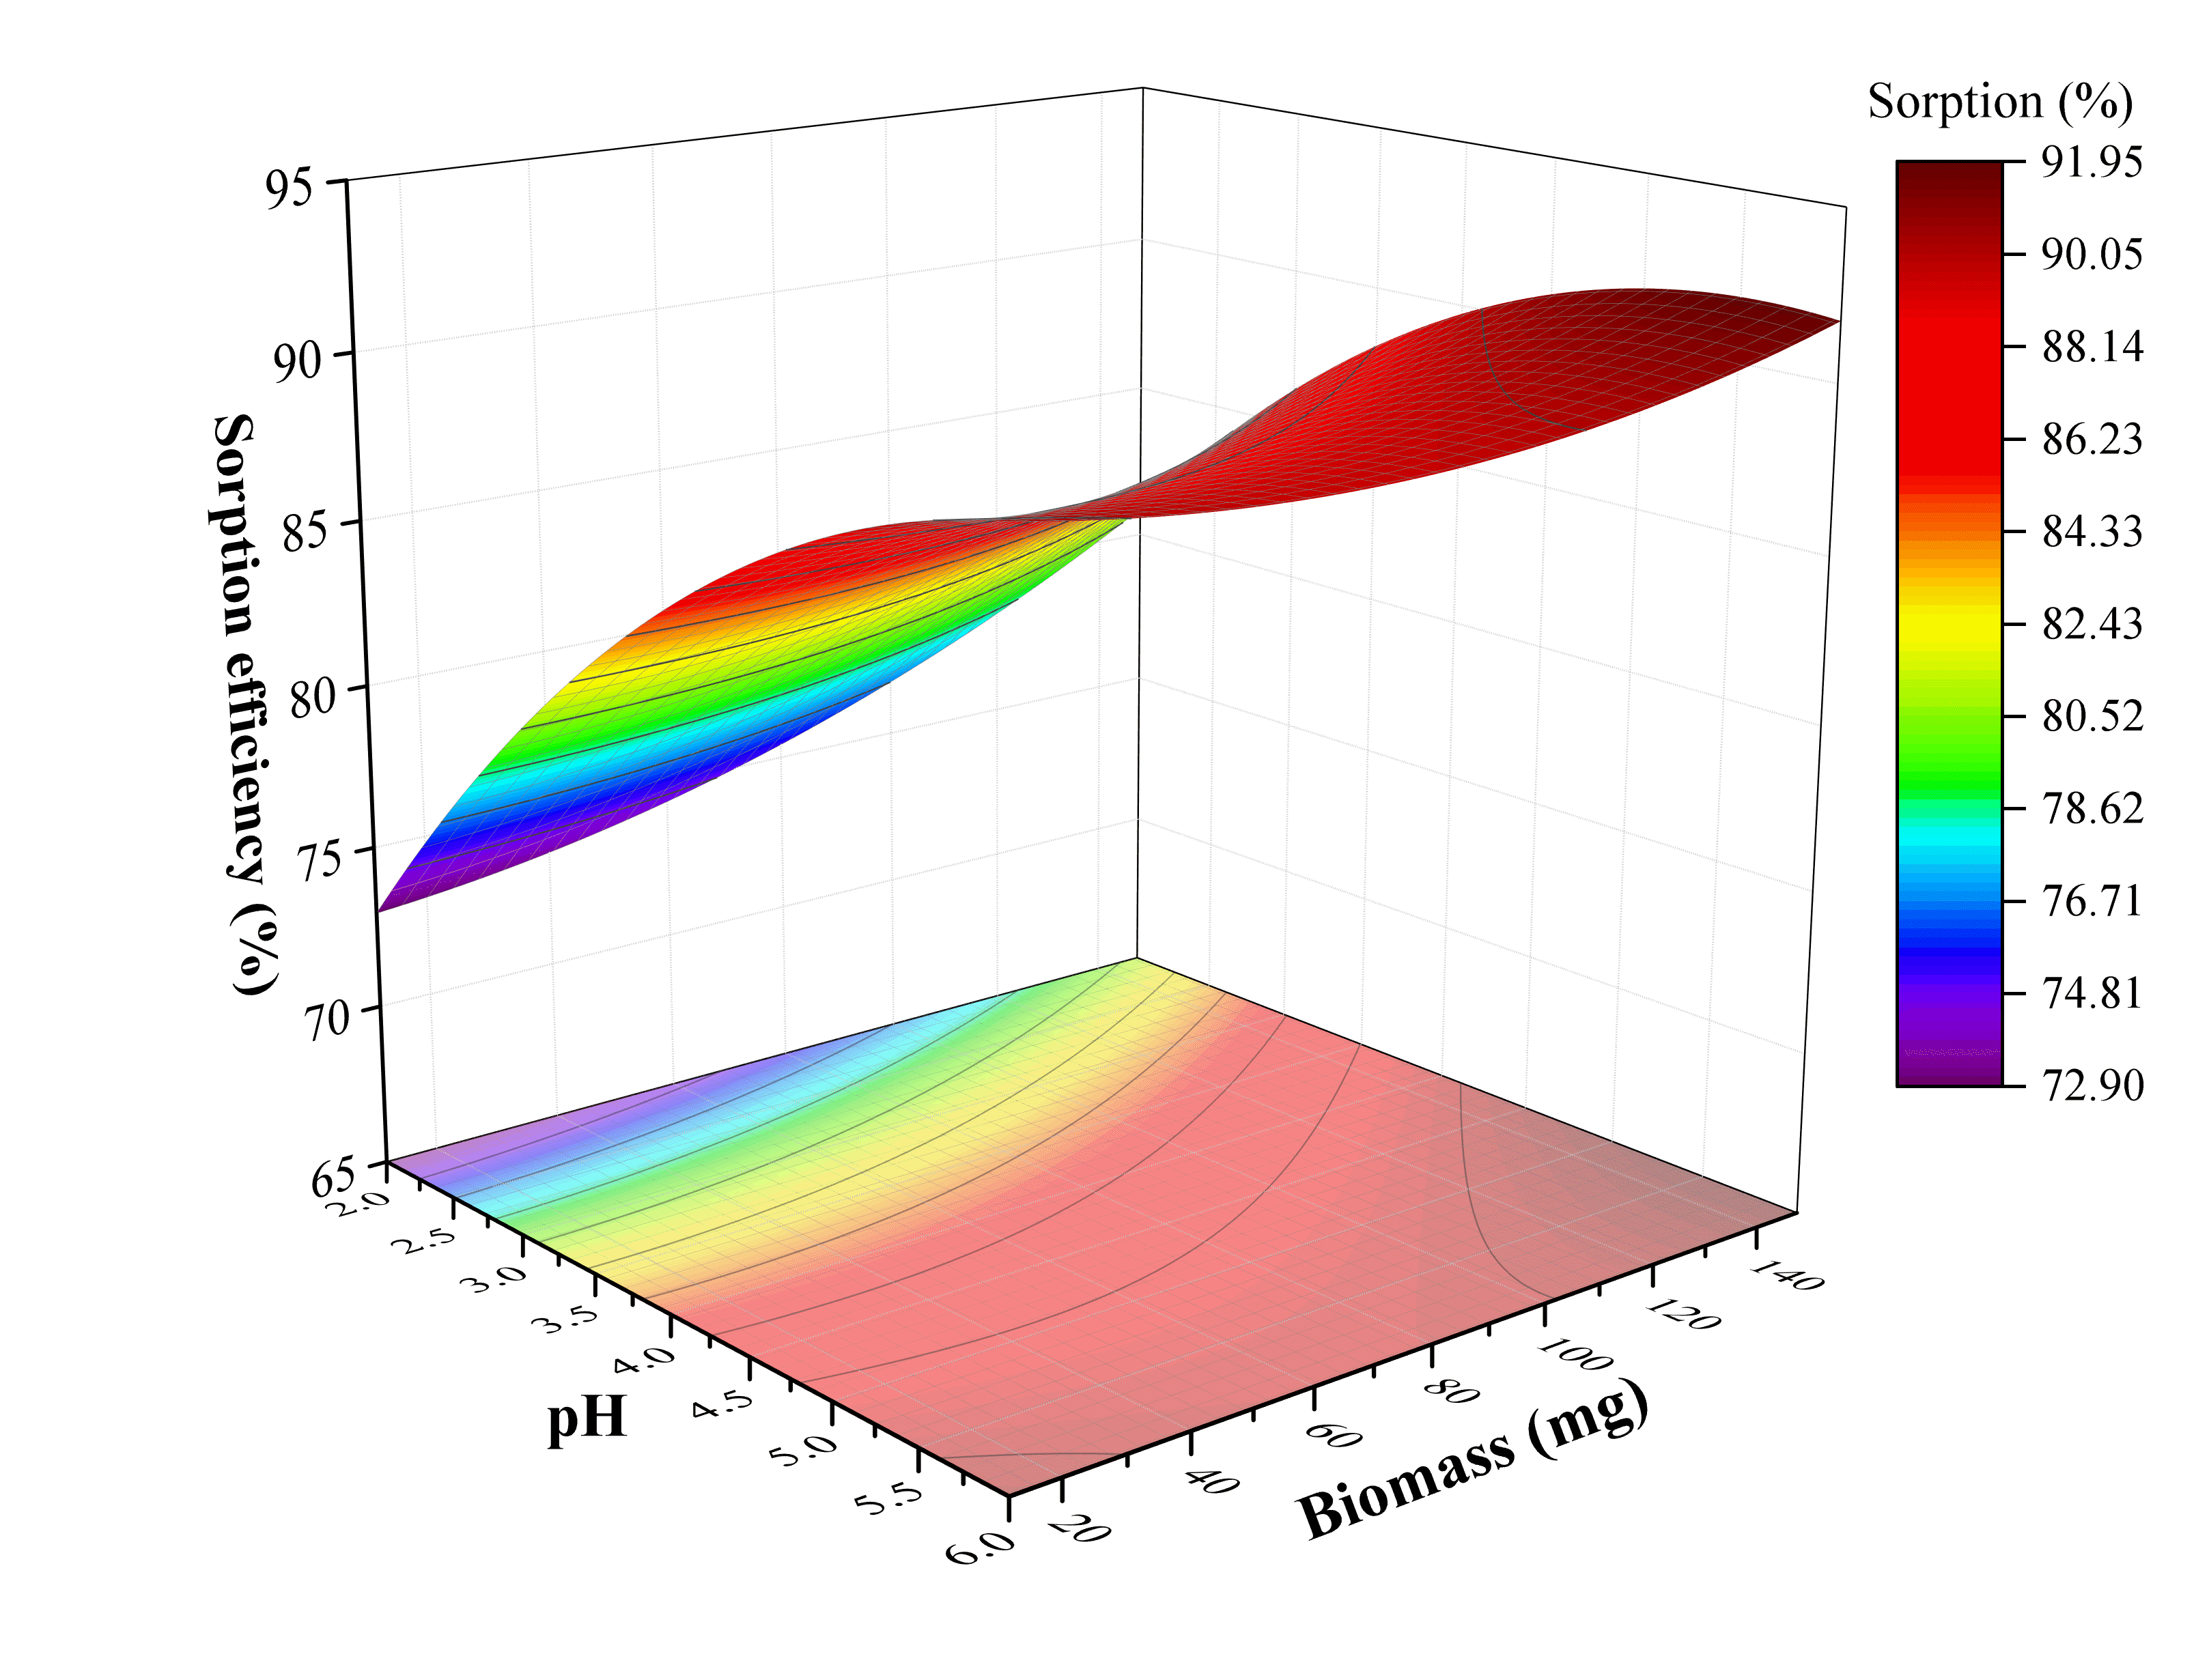


**Fig. S3** Response surface plot that shows the effect of pH and biomass dose on the sorption efficiency of TCS at 115.9 rpm.


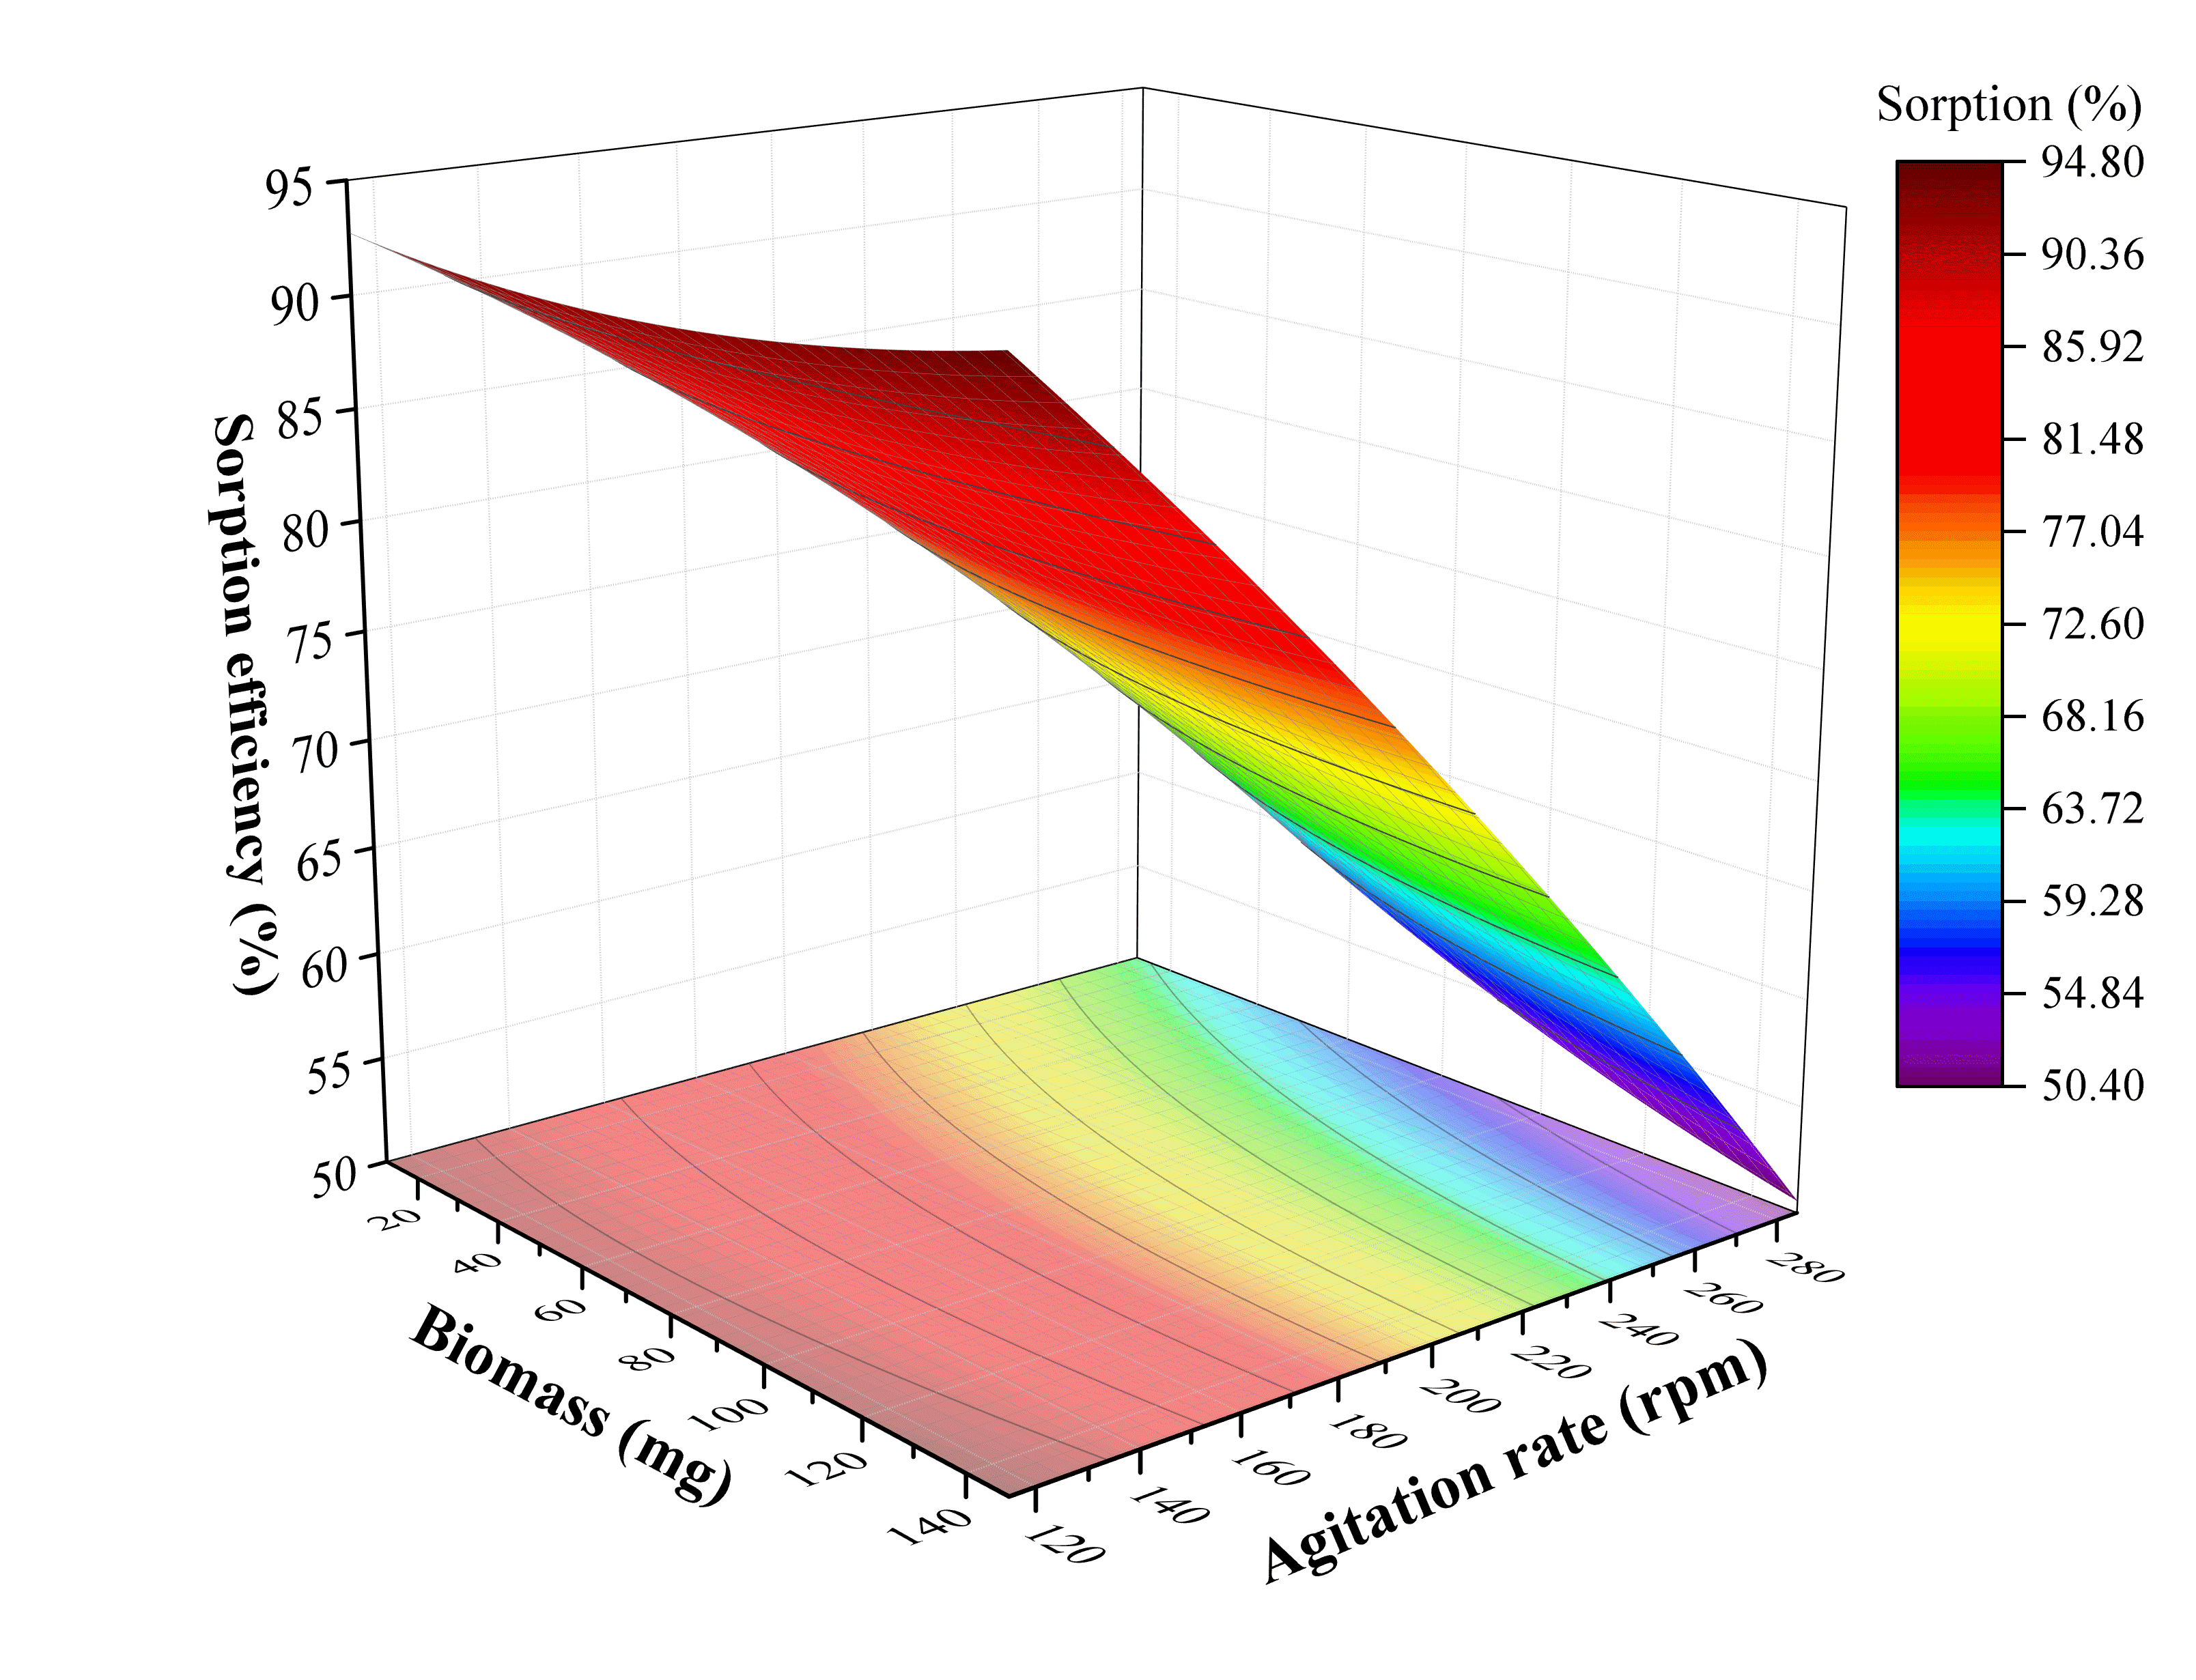


**Fig. S4** Response surface plot that shows the effect of biomass dose and agitation rate dose on the sorption efficiency of TCS at pH 5.68.

**Fig. S5** Effect of lipids on the sorption isotherms of TCS. Data were modeled with the Freundlich isotherm (―).
